# Supplementary material for: Formation of pyramidal structures through mixing gold and platinum atoms: the AuxPty2+ clusters with x + y = 10
Source: Royal Society of Chemistry journal article supplement (doi:10.1039/d3ra06000d), 2023-01-01
Supplement: d3ra06000d1.pdf [file d3ra06000d1.pdf]

## **Supplementary Information (SI) File**

# **Formation of pyramidal structures through mixing gold and platinum atoms: The $\text{Au}_x\text{Pt}_y^{2+}$ clusters with $x + y = 10$**

**Bao-Ngan Nguyen-Ha,<sup>1,2</sup> Cam-Tu Phan Dang,<sup>3,4</sup> Long Van Duong,<sup>2,5</sup>**

**My Phuong Pham-Ho,<sup>6,7</sup> Minh Tho Nguyen,<sup>1,2,\*</sup> Nguyen Minh Tam<sup>8,\*</sup>**

<sup>1</sup> Laboratory for Chemical Computation and Modeling, Institute for Computational Science and Artificial Intelligence, Van Lang University, Ho Chi Minh City, Vietnam. Email: [ngan.nguyenhabao@vlu.edu.vn](mailto:ngan.nguyenhabao@vlu.edu.vn); [minhtho.nguyen@vlu.edu.vn](mailto:minhtho.nguyen@vlu.edu.vn)

<sup>2</sup> Faculty of Applied Technology, School of Technology, Van Lang University, Ho Chi Minh City, Vietnam

<sup>3</sup> Faculty of Natural Sciences, Duy Tan University, Da Nang, Vietnam

<sup>4</sup> Institute of Research and Development, Duy Tan University, Da Nang, Vietnam

<sup>5</sup> Atomic Molecular and Optical Physics Research Group, Science and Technology Advanced Institute, Van Lang University, Ho Chi Minh City, Vietnam

<sup>6</sup> Faculty of Chemical Engineering, Ho Chi Minh City University of Technology (HCMUT), 268 Ly Thuong Kiet Street, District 10, Ho Chi Minh City, Vietnam

<sup>7</sup> Vietnam National University Ho Chi Minh City, Linh Trung Ward, Thu Duc City, Ho Chi Minh City, Vietnam.

<sup>8</sup> Faculty of Basic Sciences, University of Phan Thiet, 225 Nguyen Thong, Phan Thiet City, Binh Thuan, Vietnam. Email: [nmtam@upt.edu.vn](mailto:nmtam@upt.edu.vn)

## Contents:

- i) Structures, relative energies (eV), and spin states (in bracket) of the low-lying isomers of  $\text{Au}_x\text{Pt}_y^{2+}$  with  $x + y = 10$  using B3PW91, TPSSh, BP86 and revTPSS/ aug-cc-pVTZ-PP + ZPE computations. (Figure S1 and S2)
- ii) Adaptive natural density partitioning (AdNDP) analysis of the  $\text{Au}_x\text{Pt}_y^{2+}$  clusters with  $x + y = 10$  at B3PW91/ cc-pVTZ-PP theory level (Figures S3-S14).
- iii) Calculated density of states (DOS) of the  $\text{Au}_x\text{Pt}_y^{2+}$  ( $x + y = 10$ ) at B3PW91/aug-cc-pVTZ-PP theory level (Figure S15).
- iv) Optimized geometrical shapes and Cartesian coordinates of the lowest-lying  $\text{Au}_x\text{Pt}_y^{2+}$  ( $x + y = 10$ ) isomers calculated at B3PW91/ aug-cc-pVTZ-PP method (Table S1).

| Method      | Structures                                                                                                                                |                                                                                                                                           |                                                                                                                                            |                                                                                                                                             |
|-------------|-------------------------------------------------------------------------------------------------------------------------------------------|-------------------------------------------------------------------------------------------------------------------------------------------|--------------------------------------------------------------------------------------------------------------------------------------------|---------------------------------------------------------------------------------------------------------------------------------------------|
|             | 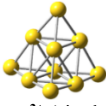<br><b>Au<sub>10</sub><sup>2+</sup> (singlet)</b>        |                                                                                                                                           |                                                                                                                                            |                                                                                                                                             |
|             | <br><b>Au<sub>9</sub>Pt<sup>2+</sup>.A</b>               | <br><b>Au<sub>9</sub>Pt<sup>2+</sup>.B</b>               | <br><b>Au<sub>9</sub>Pt<sup>2+</sup>.C</b>               | <br><b>Au<sub>9</sub>Pt<sup>2+</sup>.D</b>               |
| B3PW91      | 0.00 (doublet)                                                                                                                            | 0.42 (doublet)                                                                                                                            | 0.42 (doublet)                                                                                                                             | 0.47 (doublet)                                                                                                                              |
| TPSSh       | 0.00 (doublet)                                                                                                                            | 0.42 (doublet)                                                                                                                            | 0.37 (doublet)                                                                                                                             | 0.30 (doublet)                                                                                                                              |
| BP86        | 0.00 (doublet)                                                                                                                            | 0.31 (doublet)                                                                                                                            | 0.48 (doublet)                                                                                                                             | 0.49 (doublet)                                                                                                                              |
| revTPSS     | 0.00 (doublet)                                                                                                                            | 0.37 (doublet)                                                                                                                            | 0.35 (doublet)                                                                                                                             | 0.26 (doublet)                                                                                                                              |
|             | <br><b>Au<sub>8</sub>Pt<sub>2</sub><sup>2+</sup>.A</b>   | <br><b>Au<sub>8</sub>Pt<sub>2</sub><sup>2+</sup>.A</b>   | <br><b>Au<sub>8</sub>Pt<sub>2</sub><sup>2+</sup>.B</b>   | <br><b>Au<sub>8</sub>Pt<sub>2</sub><sup>2+</sup>.D</b>   |
| B3PW91      | 0.00 (triplet)                                                                                                                            | 0.07 (singlet)                                                                                                                            | 0.17 (triplet)                                                                                                                             | 0.18 (singlet)                                                                                                                              |
| TPSSh       | 0.00 (triplet)                                                                                                                            | 0.11 (singlet)                                                                                                                            | 0.16 (triplet)                                                                                                                             | 0.20 (triplet)                                                                                                                              |
| BP86        | 0.00 (triplet)                                                                                                                            | 0.10 (singlet)                                                                                                                            | 0.15 (triplet)                                                                                                                             | 0.13 (triplet)                                                                                                                              |
| revTPSS     | 0.00 (triplet)                                                                                                                            | 0.12 (singlet)                                                                                                                            | 0.15 (triplet)                                                                                                                             | 0.24 (triplet)                                                                                                                              |
|             | <br><b>Au<sub>7</sub>Pt<sub>3</sub><sup>2+</sup>.A</b>  | <br><b>Au<sub>7</sub>Pt<sub>3</sub><sup>2+</sup>.B</b>  | <br><b>Au<sub>7</sub>Pt<sub>3</sub><sup>2+</sup>.B</b>  | <br><b>Au<sub>7</sub>Pt<sub>3</sub><sup>2+</sup>.C</b>  |
| B3PW91      | 0.00 (quartet)                                                                                                                            |                                                                                                                                           | 0.52 (quartet)                                                                                                                             | 0.52 (quartet)                                                                                                                              |
| TPSSh       | 0.00 (quartet)                                                                                                                            | 0.22 (doublet)                                                                                                                            | 0.49 (quartet)                                                                                                                             | 0.44 (quartet)                                                                                                                              |
| BP86        | 0.00 (quartet)                                                                                                                            | 0.16 (doublet)                                                                                                                            | 0.37 (quartet)                                                                                                                             | 0.39 (quartet)                                                                                                                              |
| revTPSS     | 0.00 (quartet)                                                                                                                            |                                                                                                                                           | 0.42 (quartet)                                                                                                                             | 0.38 (quartet)                                                                                                                              |
|             | <br><b>Au<sub>6</sub>Pt<sub>4</sub><sup>2+</sup>.A</b> | <br><b>Au<sub>6</sub>Pt<sub>4</sub><sup>2+</sup>.B</b> | <br><b>Au<sub>6</sub>Pt<sub>4</sub><sup>2+</sup>.C</b> | <br><b>Au<sub>6</sub>Pt<sub>4</sub><sup>2+</sup>.D</b> |
| B3PW91      | 0.00 (quintet)                                                                                                                            | 0.17 (quintet)                                                                                                                            | 0.34 (quintet)                                                                                                                             | 0.46 (quintet)                                                                                                                              |
| TPSSh       | 0.00 (quintet)                                                                                                                            | 0.17 (quintet)                                                                                                                            | 0.26 (quintet)                                                                                                                             | 0.44 (quintet)                                                                                                                              |
| BP86        | 0.00 (quintet)                                                                                                                            | 0.17 (quintet)                                                                                                                            | 0.04 (quintet)                                                                                                                             | 0.25 (quintet)                                                                                                                              |
| revTPSS     | 0.00 (quintet)                                                                                                                            | 0.16 (quintet)                                                                                                                            | 0.09 (quintet)                                                                                                                             | 0.33 (quintet)                                                                                                                              |
|             | <br><b>Au<sub>5</sub>Pt<sub>5</sub><sup>2+</sup>.A</b> | <br><b>Au<sub>5</sub>Pt<sub>5</sub><sup>2+</sup>.B</b> | <br><b>Au<sub>5</sub>Pt<sub>5</sub><sup>2+</sup>.C</b> | <br><b>Au<sub>5</sub>Pt<sub>5</sub><sup>2+</sup>.C</b> |
| B3PW91      | 0.00 (sextet)                                                                                                                             | 0.11 (sextet)                                                                                                                             | 0.15 (quartet)                                                                                                                             | 0.17 (sextet)                                                                                                                               |
| TPSSh       | 0.00 (sextet)                                                                                                                             | 0.14 (sextet)                                                                                                                             | 0.13 (quartet)                                                                                                                             | 0.15 (sextet)                                                                                                                               |
| BP86        | 0.03 (sextet)                                                                                                                             | 0.05 (sextet)                                                                                                                             | 0.00 (quartet)                                                                                                                             | 0.05 (sextet)                                                                                                                               |
| revTPSS     | 0.00 (sextet)                                                                                                                             | 0.02 (sextet)                                                                                                                             | 0.03 (quartet)                                                                                                                             | 0.08 (sextet)                                                                                                                               |
| CCSD(T) (*) | 0.00 (sextet)                                                                                                                             | 0.13 (sextet)                                                                                                                             |                                                                                                                                            |                                                                                                                                             |

**Figure S1.** Structures, relative energies (eV), and spin states (in bracket) of the most stable isomers of Au<sub>x</sub>Pt<sub>y</sub><sup>2+</sup> with x + y = 10 and y = 0 – 5) using B3PW91, TPSSh, BP86 and revTPSS/ aug-cc-pVTZ-PP + ZPE computations. (\*) is calculated at CCSD(T)/ cc-pVDZ-PP method. Yellow ball = Au and white ball = Pt.

| Method  | Structures                                                                                                                                |                                                                                                                                         |                                                                                                                                          |                                                                                                                                           |
|---------|-------------------------------------------------------------------------------------------------------------------------------------------|-----------------------------------------------------------------------------------------------------------------------------------------|------------------------------------------------------------------------------------------------------------------------------------------|-------------------------------------------------------------------------------------------------------------------------------------------|
|         | 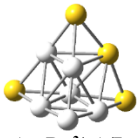<br><b>Au<sub>4</sub>Pt<sub>6</sub><sup>2+</sup>.A/L</b> | <br><b>Au<sub>4</sub>Pt<sub>6</sub><sup>2+</sup>.B</b> | <br><b>Au<sub>4</sub>Pt<sub>6</sub><sup>2+</sup>.A</b> | <br><b>Au<sub>4</sub>Pt<sub>6</sub><sup>2+</sup>.D</b> |
| B3PW91  | 0.00 (septet)                                                                                                                             | 0.27 (septet)                                                                                                                           | 0.48 (quintet)                                                                                                                           | 0.61 (quintet)                                                                                                                            |
| TPSSh   | 0.00 (septet)                                                                                                                             | 0.28 (septet)                                                                                                                           | 0.20 (quintet)                                                                                                                           | 0.55 (quintet)                                                                                                                            |
| BP86    | 0.00 (septet)                                                                                                                             | 0.22 (septet)                                                                                                                           | 0.12 (quintet)                                                                                                                           | 0.25 (quintet)                                                                                                                            |
| revTPSS | 0.00 (septet)                                                                                                                             | 0.26 (septet)                                                                                                                           | 0.17 (quintet)                                                                                                                           | 0.55 (quintet)                                                                                                                            |
|         | <br><b>Au<sub>3</sub>Pt<sub>7</sub><sup>2+</sup>.A/L</b> | <br><b>Au<sub>3</sub>Pt<sub>7</sub><sup>2+</sup>.B</b> | <br><b>Au<sub>2</sub>Pt<sub>8</sub><sup>2+</sup>.A</b> | <br><b>Au<sub>2</sub>Pt<sub>8</sub><sup>2+</sup>.B</b> |
| B3PW91  | 0.00 (octet)<br>0.10 (sextet)<br>0.28 (quartet)                                                                                           | 0.11 (octet)                                                                                                                            | 0.00 (nonet)<br>0.36 (septet)                                                                                                            | 0.56 (nonet)<br>0.64 (septet)                                                                                                             |
| TPSSh   | 0.01 (octet)                                                                                                                              | 0.00 (sextet)<br>0.05 (octet)                                                                                                           | 0.00 (nonet)<br>0.35 (septet)                                                                                                            | 0.59 (nonet)<br>0.56 (septet)                                                                                                             |
| BP86    | 0.09 (sextet)<br>0.10 (octet)                                                                                                             | 0.00 (sextet)<br>0.04 (octet)                                                                                                           | 0.00 (nonet)                                                                                                                             | 0.08 (quintet)<br>0.16 (septet)                                                                                                           |
| revTPSS | 0.10 (octet)<br>0.13 (sextet)<br>0.28 (quartet)                                                                                           | 0.00 (sextet)<br>0.06 (octet)                                                                                                           | 0.00 (nonet)<br>0.28 (septet)                                                                                                            | 0.26 (quintet)<br>0.42 (nonet)                                                                                                            |
|         | <br><b>AuPt<sub>9</sub><sup>2+</sup>.A</b>             | <br><b>AuPt<sub>9</sub><sup>2+</sup>.B</b>           | <br><b>Pt<sub>10</sub><sup>2+</sup></b>             |                                                                                                                                           |
| B3PW91  | 0.00 (10-et)<br>0.14 (octet)<br>0.17 (sextet)                                                                                             | 0.80 (quartet)                                                                                                                          | 0.00 (11-et)<br>0.10 (nonet)<br>0.30 (septet)                                                                                            |                                                                                                                                           |
| TPSSh   | 0.00 (10-et)<br>0.07 (octet)<br>0.12 (sextet)                                                                                             | 0.62 (quartet)                                                                                                                          | 0.00 (11-et)<br>0.07 (nonet)<br>0.04 (septet)                                                                                            |                                                                                                                                           |
| BP86    | 0.00 (octet)<br>0.05 (sextet)<br>0.11 (10-et)                                                                                             | 0.13 (quartet)                                                                                                                          | 0.00 (septet)<br>0.00 (quintet)<br>0.30 (nonet)<br>0.30 (11-et)                                                                          |                                                                                                                                           |
| revTPSS | 0.07 (10-et)<br>0.00 (octet)<br>0.07 (sextet)                                                                                             | 0.29 (quartet)                                                                                                                          | 0.40 (11-et)<br>0.26 (nonet)<br>0.00 (septet)                                                                                            |                                                                                                                                           |

**Figure S2.** Structures, relative energies (eV), and spin states (in bracket) of the most stable isomers of Au<sub>x</sub>Pt<sub>y</sub><sup>2+</sup> with x + y = 10 and y = 6 - 10) using B3PW91, TPSSh, BP86 and revTPSS/ aug-cc-pVTZ-PP + ZPE computations. Yellow ball = Au and white ball = Pt.

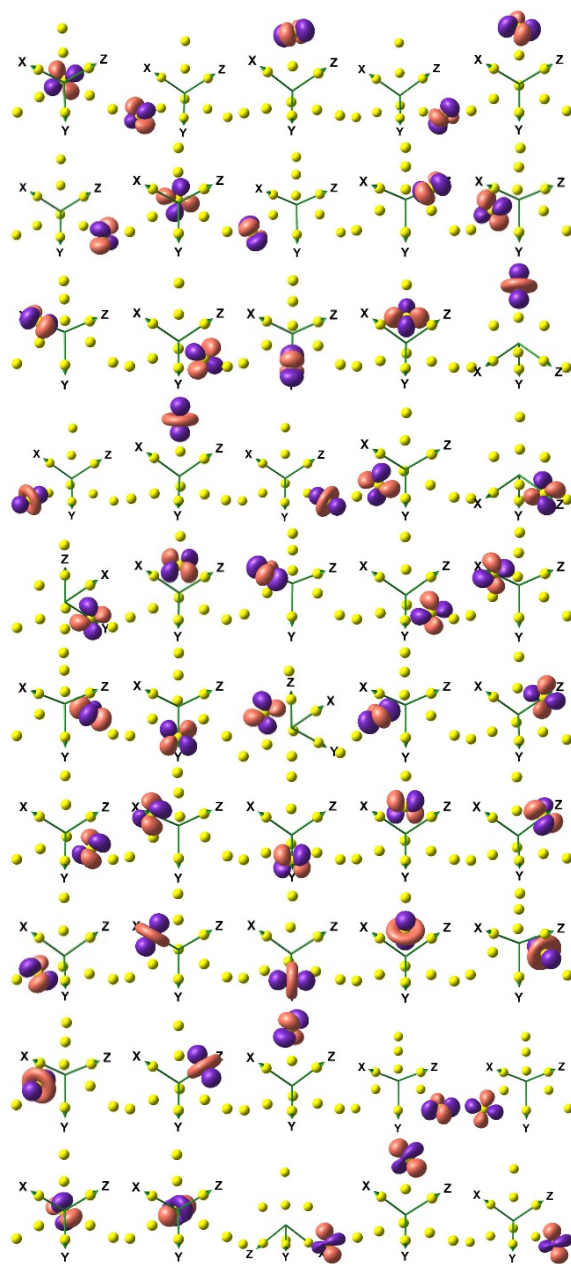

50 x (2c-1e)

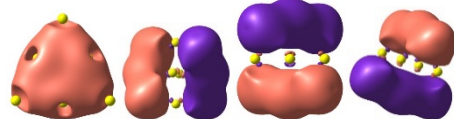

4 x (10c-2e)

**Figure S3:** AdNDP analysis showing multi-center bonds in the  $\text{Au}_{10}^{2+}$  cluster at singlet state, calculated at B3PW91/ cc-pVTZ-PP theory level.

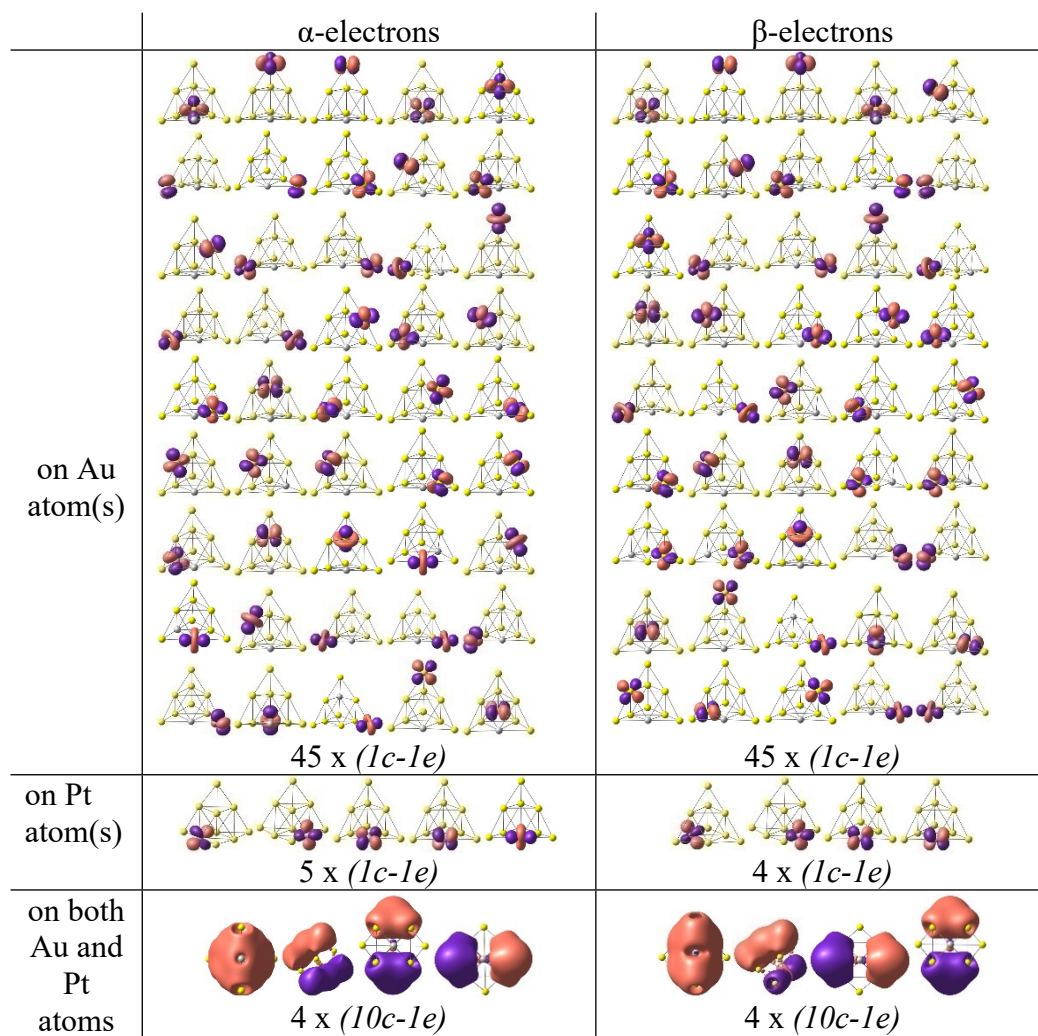

**Figure S4:** AdNDP analysis showing multi-center bonds in the  $\text{Au}_9\text{Pt}^{2+}$  cluster at doublet state, calculated at B3PW91/ cc-pVTZ-PP theory level.

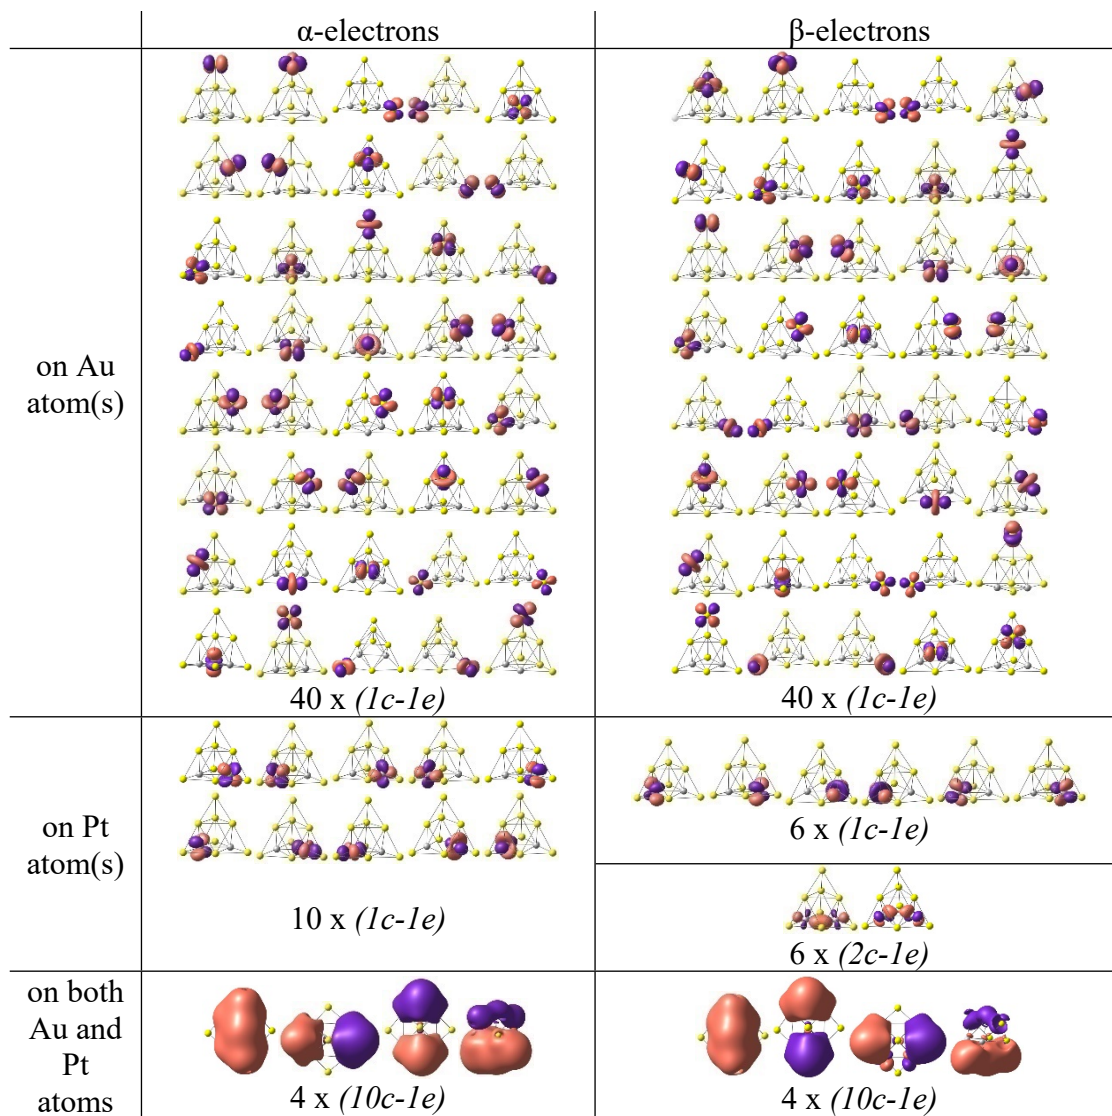

**Figure S5:** AdNDP analysis showing multi-center bonds in the  $\text{Au}_8\text{Pt}_2^{2+}$  cluster at triplet state, calculated at B3PW91/ cc-pVTZ-PP theory level.



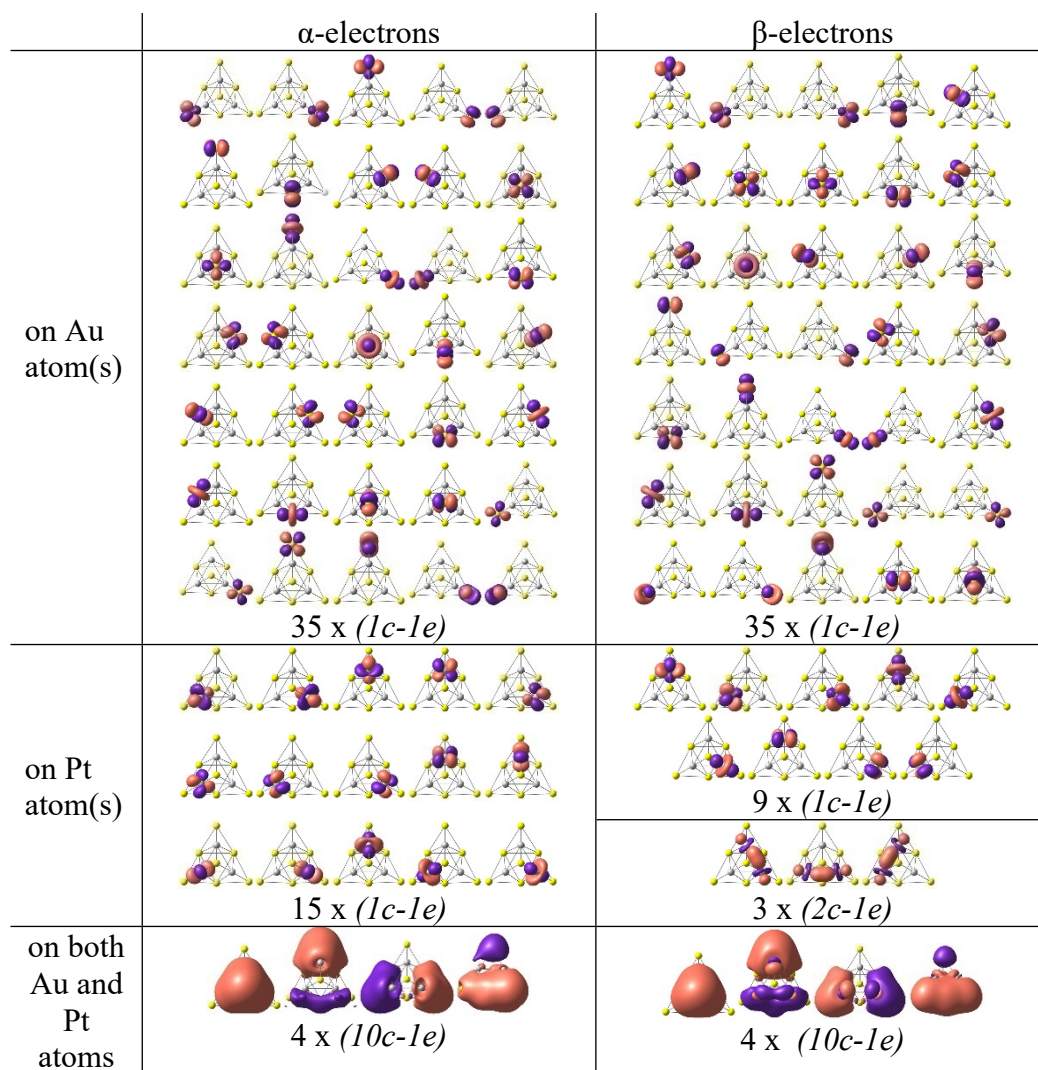

**Figure S6:** AdNDP analysis showing multi-center bonds in the  $\text{Au}_7\text{Pt}_3^{2+}$  cluster at quartet state, calculated at B3PW91/ cc-pVTZ-PP theory level.



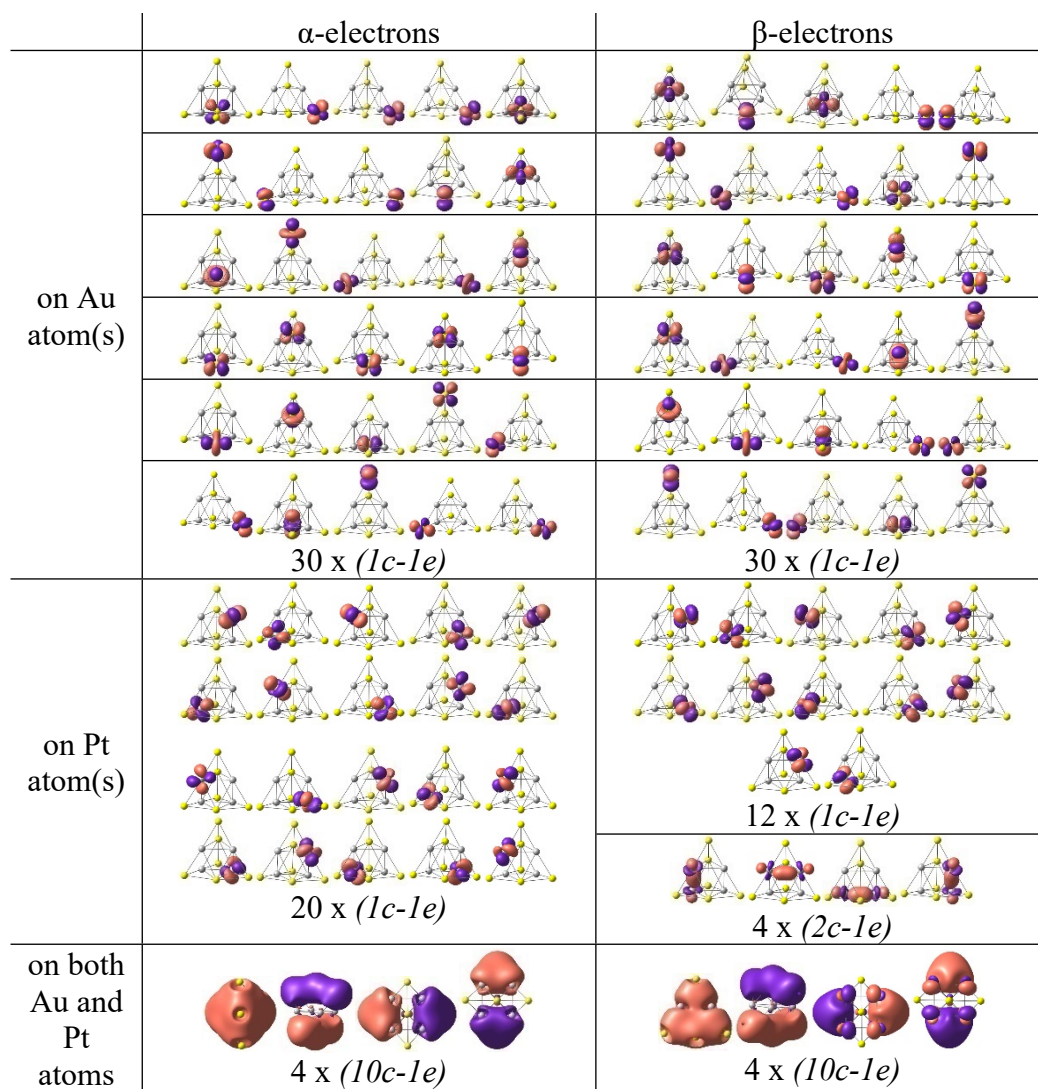

**Figure S7:** AdNDP analysis showing multi-center bonds in the  $\text{Au}_6\text{Pt}_4^{2+}$  cluster at quintet state, calculated at B3PW91/ cc-pVTZ-PP theory level.

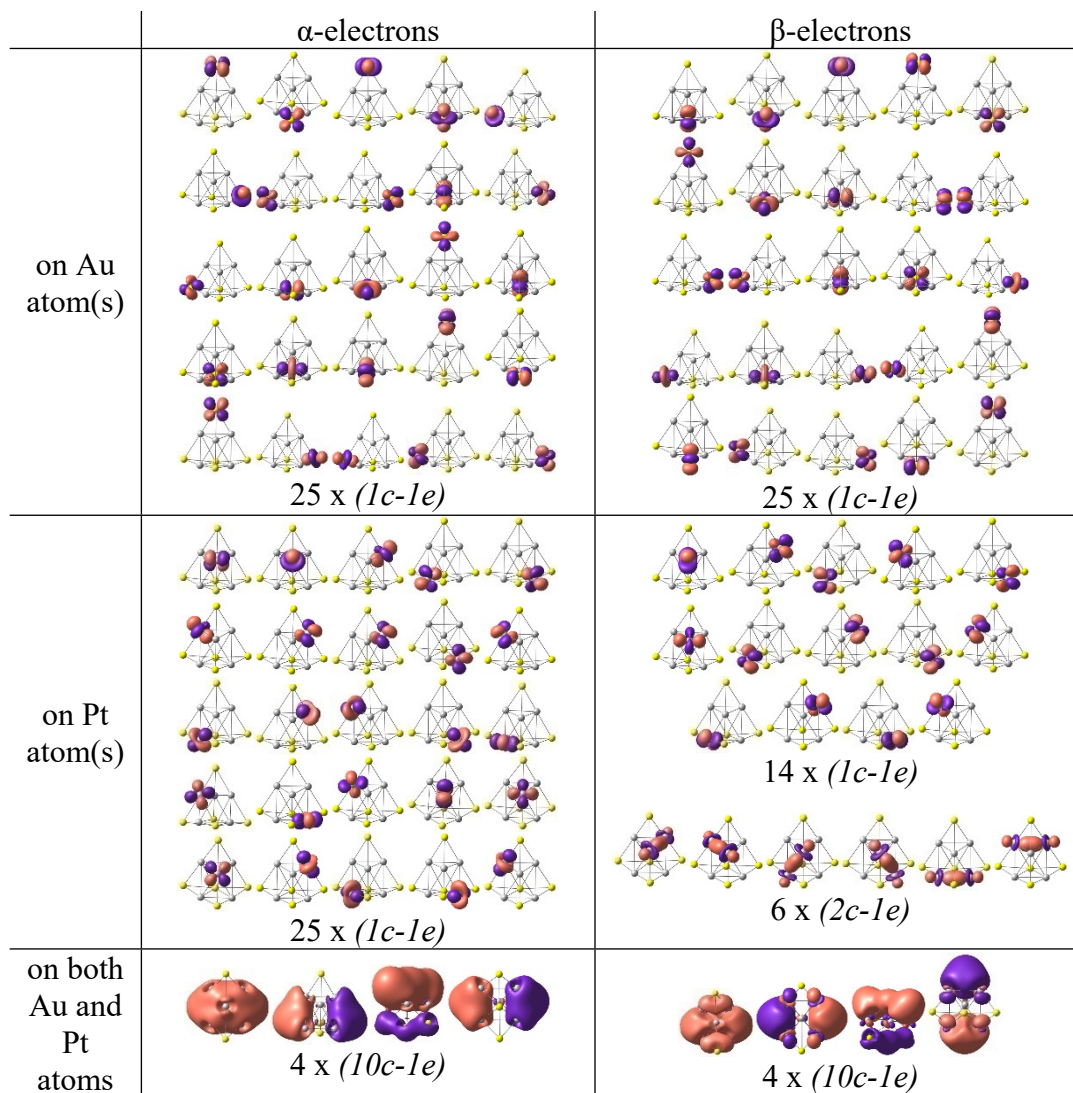

**Figure S8:** AdNDP analysis showing multi-center bonds in the  $\text{Au}_5\text{Pt}_5^{2+}$  cluster at sextet state, calculated at B3PW91/ cc-pVTZ-PP theory level.

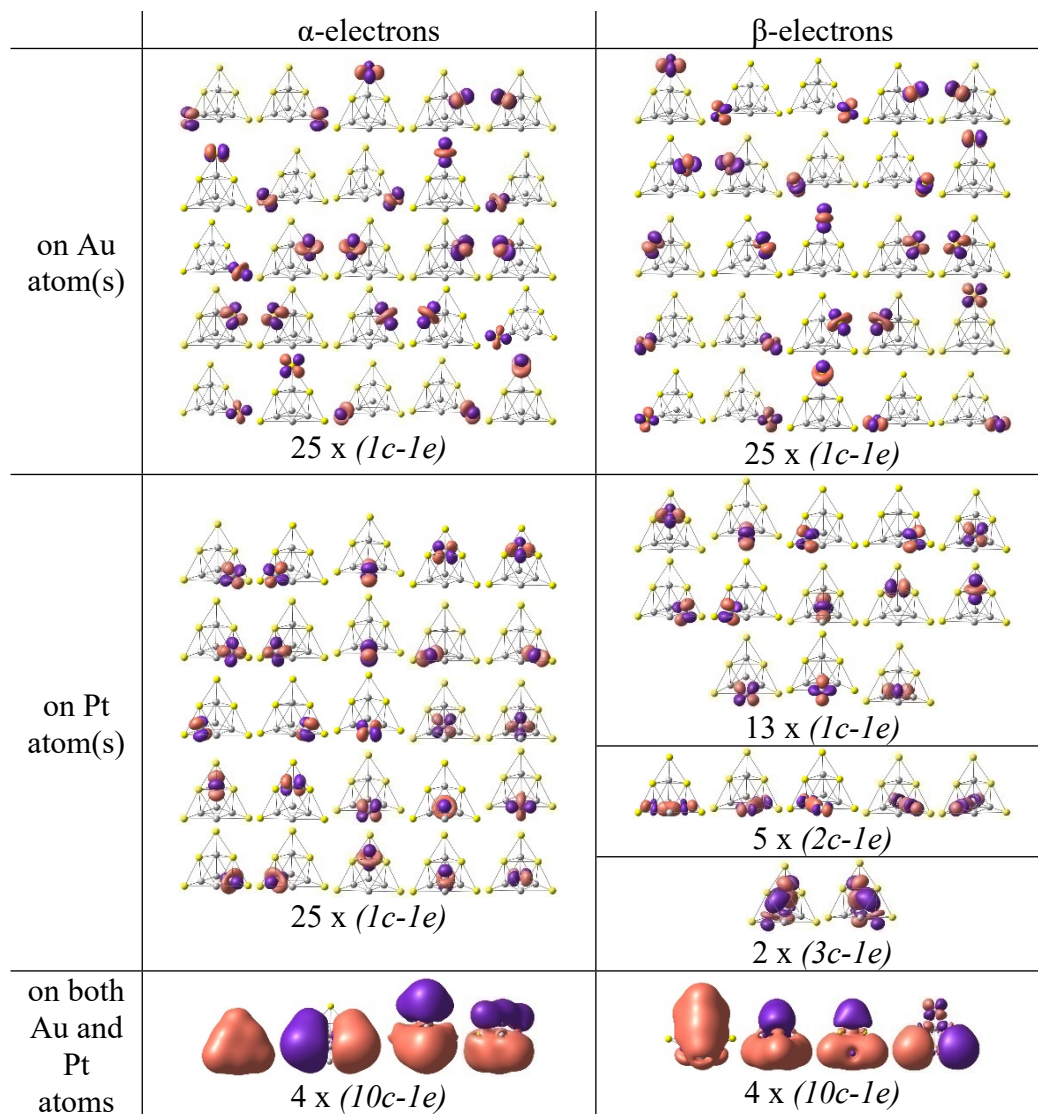

**Figure S9:** AdNDP analysis showing multi-center bonds in the  $\text{Au}_5\text{Pt}_5^{2+}\cdot\text{B}$  cluster at sextet state, calculated at B3PW91/ cc-pVTZ-PP theory level.

$\alpha$ -electrons

$\beta$ -electrons

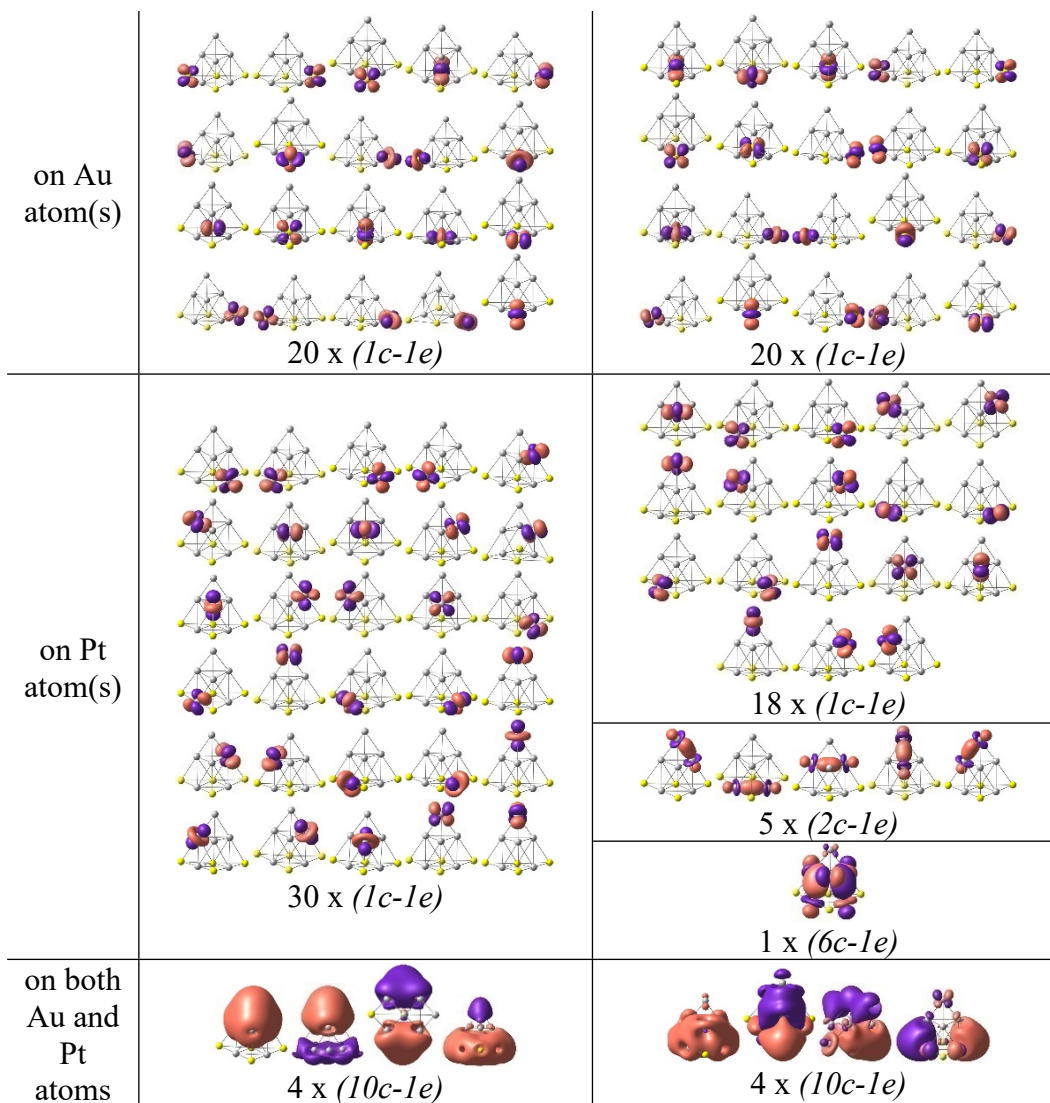

**Figure S10:** AdNDP analysis showing multi-center bonds in the  $\text{Au}_4\text{Pt}_6^{2+}$  cluster at septet state, calculated at B3PW91/ cc-pVTZ-PP theory level.



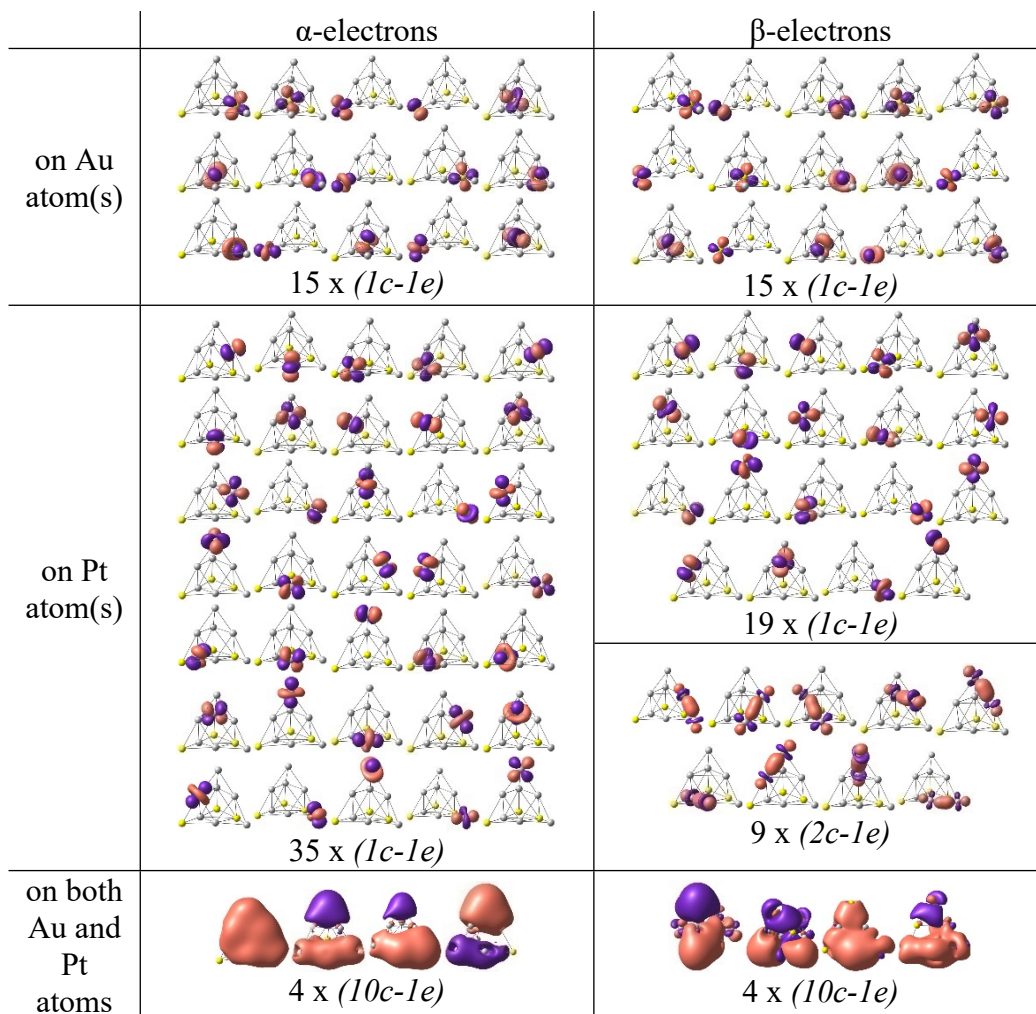

**Figure S11:** AdNDP analysis showing multi-center bonds in the  $\text{Au}_3\text{Pt}_7^{2+}$  cluster at octet state, calculated at B3PW91/ cc-pVTZ-PP theory level.

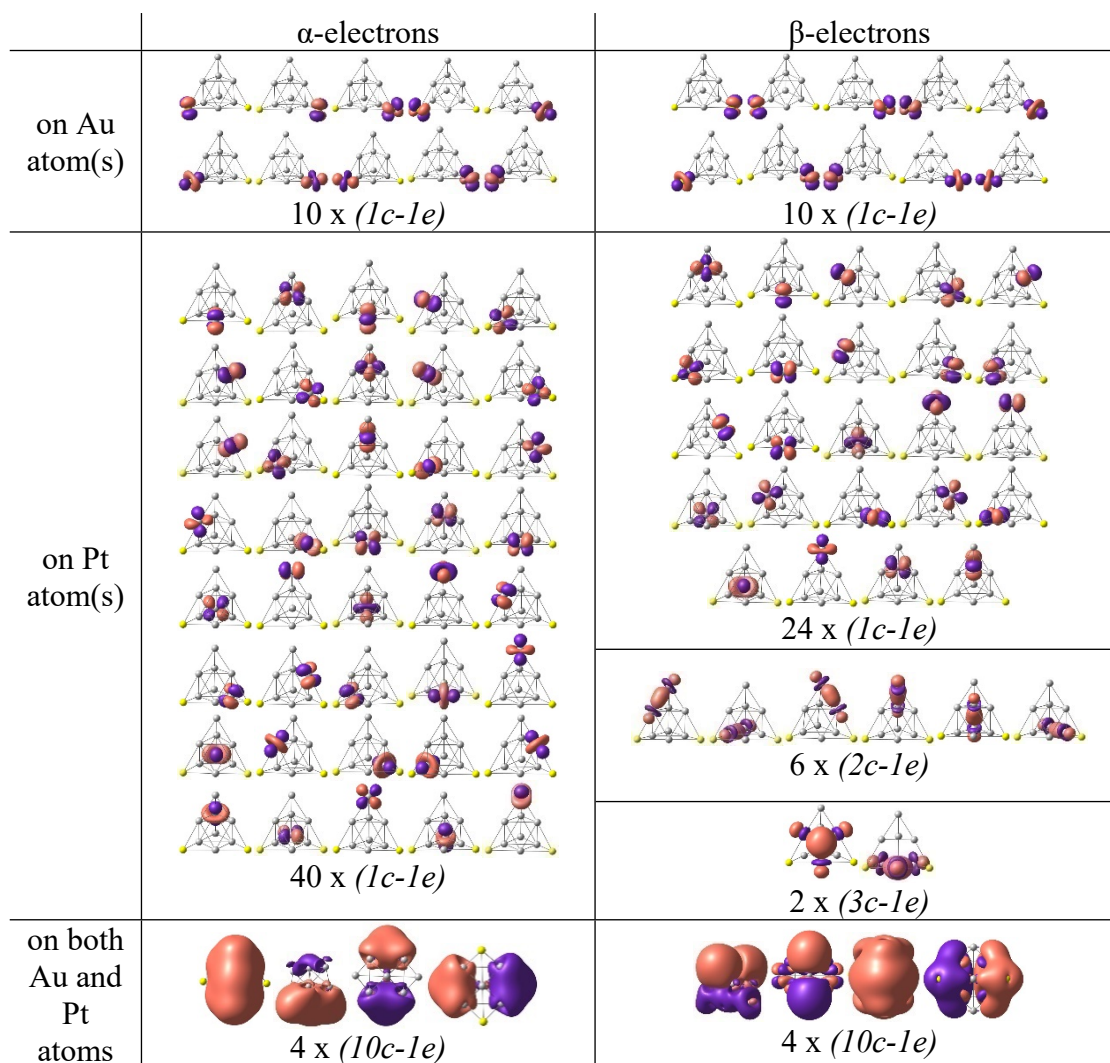

**Figure S12:** AdNDP analysis showing multi-center bonds in the  $\text{Au}_2\text{Pt}_8^{2+}$  cluster at nonet state, calculated at B3PW91/ cc-pVTZ-PP theory level.



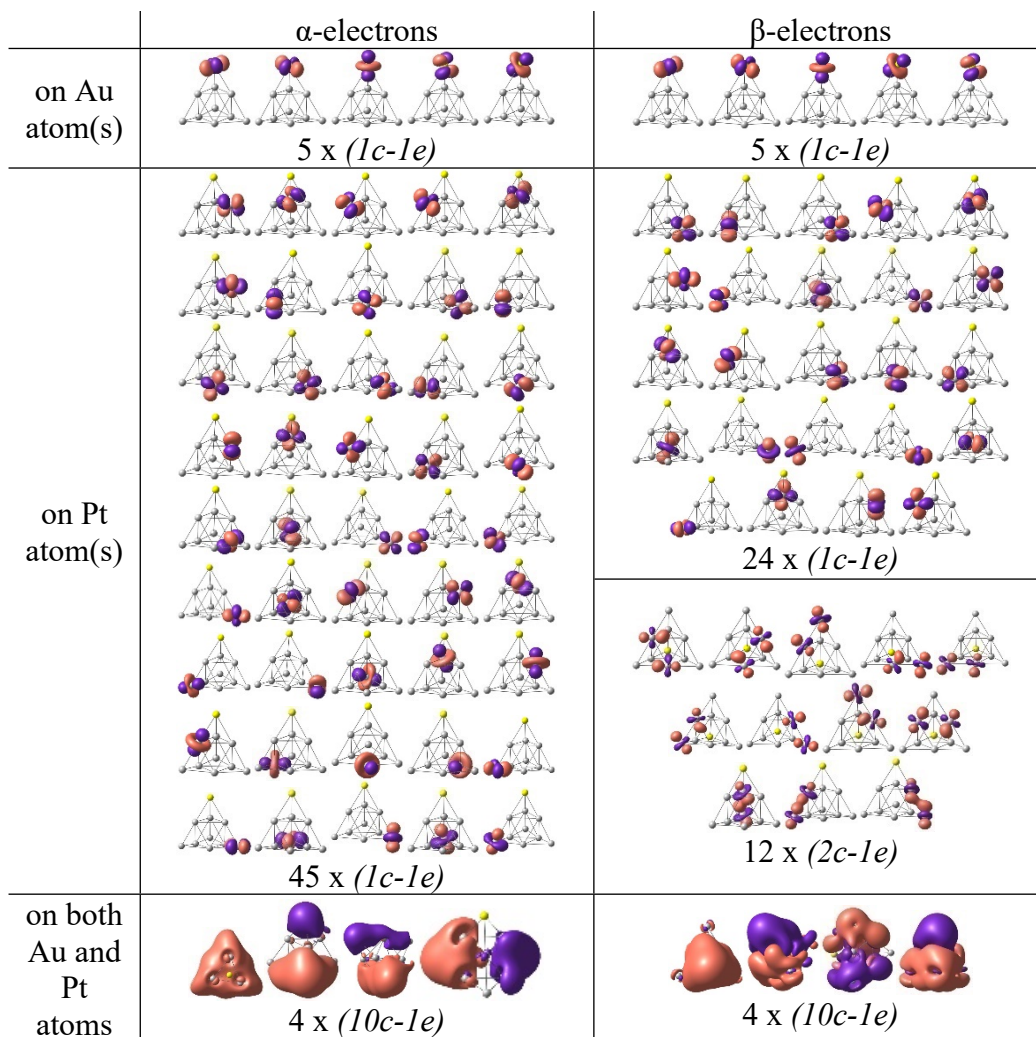

**Figure S13:** AdNDP analysis showing multi-center bonds in the  $\text{AuPt}_9^{2+}$  cluster at 10-et state, calculated at B3PW91/ cc-pVTZ-PP theory level.

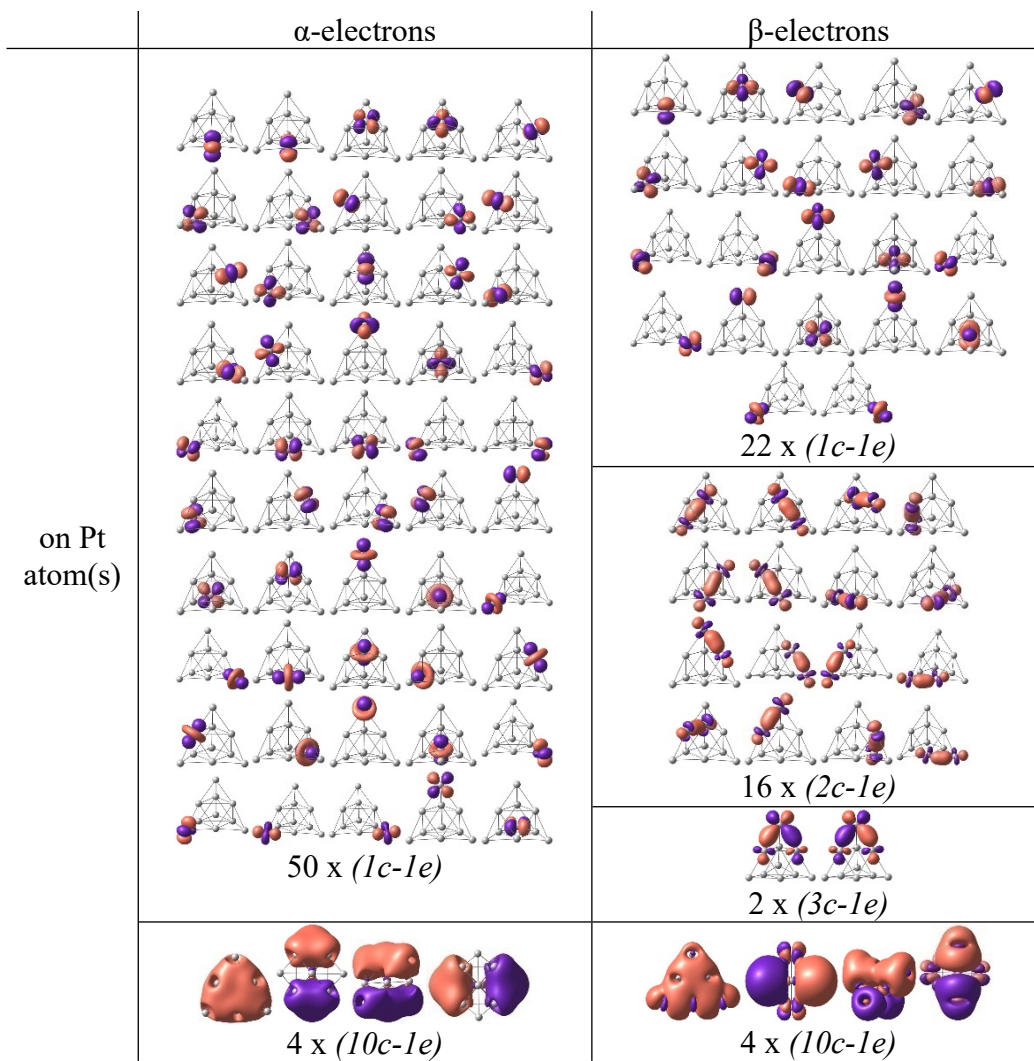

**Figure S14:** AdNDP analysis showing multi-center bonds in the  $\text{Pt}_{10}^{2+}\cdot\mathbf{A}$  cluster at 11-et state, calculated at B3PW91/ cc-pVTZ-PP theory level.

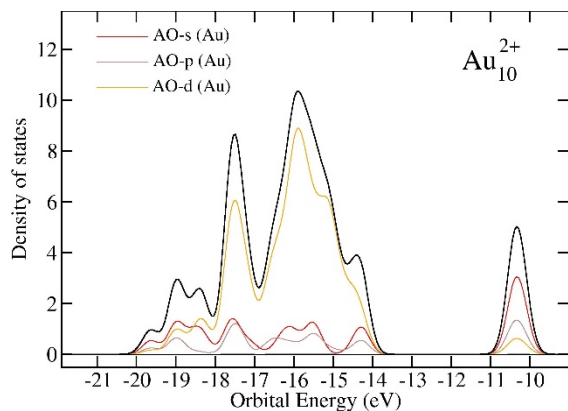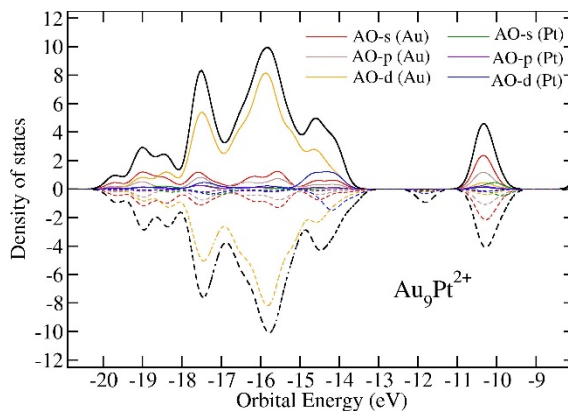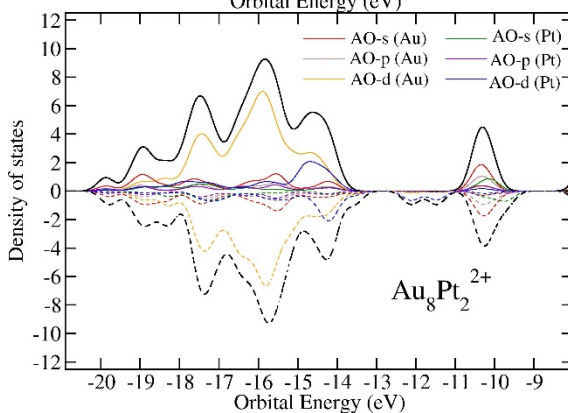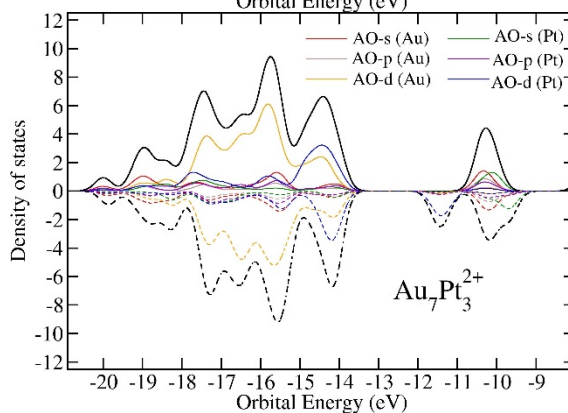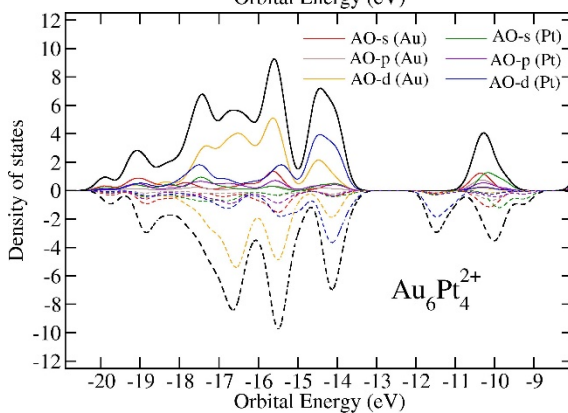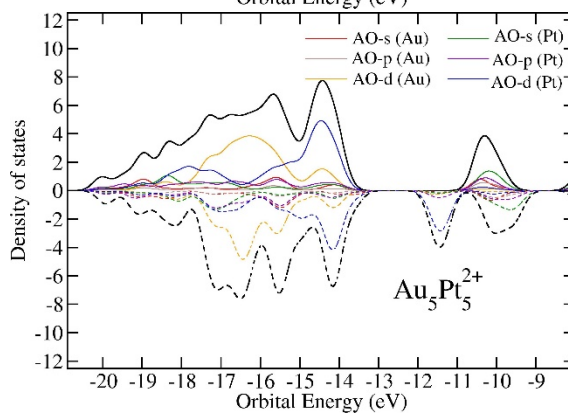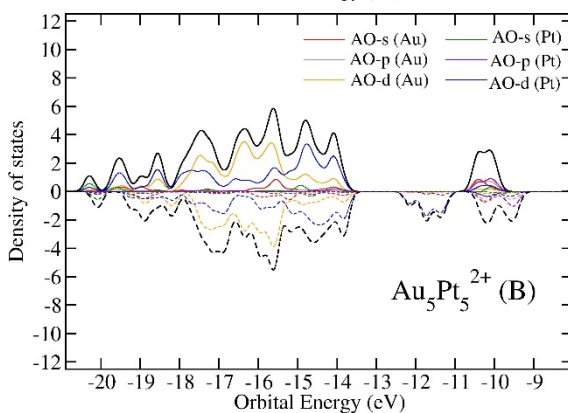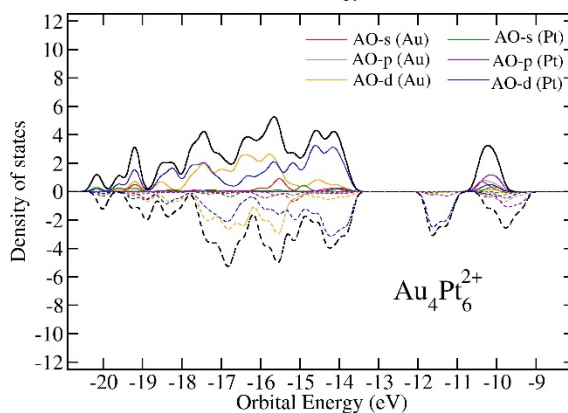

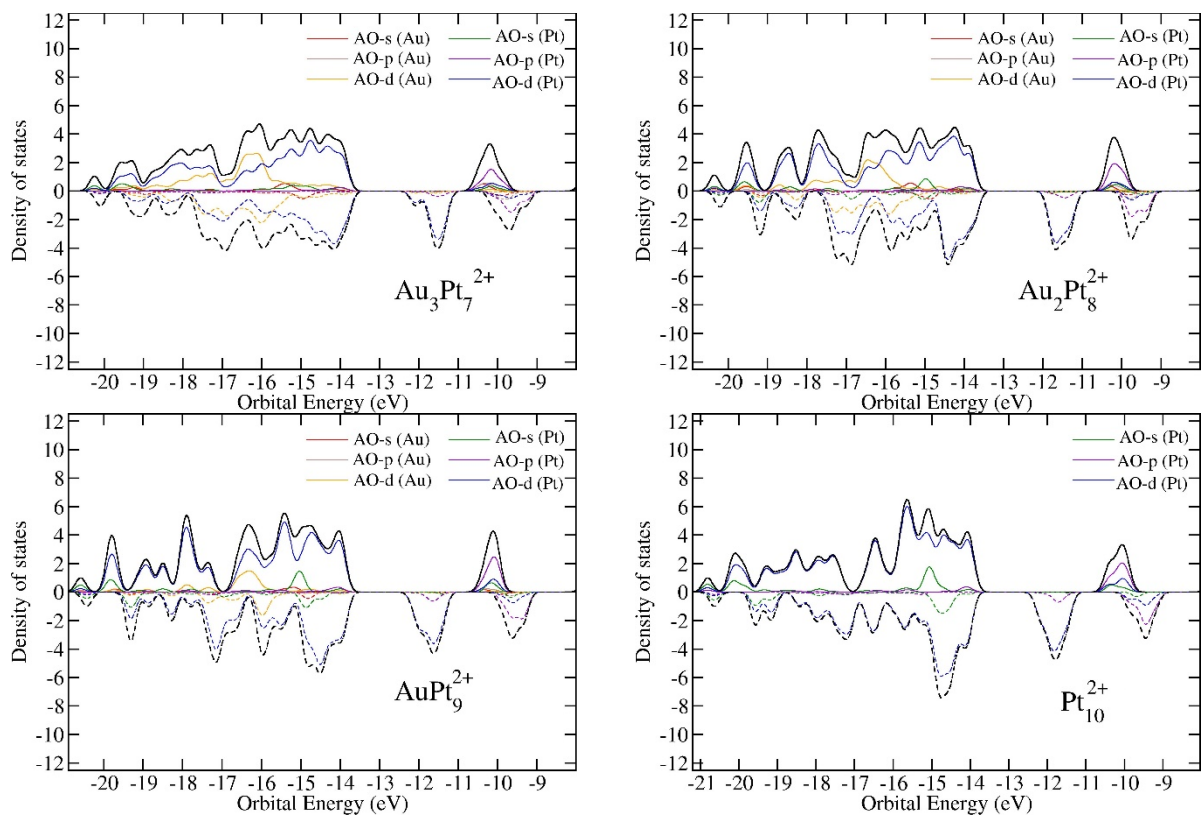

**Figure S15:** Calculated density of states (DOS) of  $\text{Au}_x\text{Pt}_y^{2+}$  ( $x+y = 10$ ) at B3PW91/aug-cc-pVTZ-PP level. Positive and negative DOS represent spin-up and spin-down electrons, respectively.

**Table S1:** Optimized geometrical shapes and Cartesian coordinates of the lowest-lying  $\text{Au}_x\text{Pt}_y^{2+}$  ( $x + y = 10$ ) isomers calculated at B3PW91/aug-cc-pVTZ-PP method.

| Isomer                                                                                                                                                                             | Coordinates |             |             |             |
|------------------------------------------------------------------------------------------------------------------------------------------------------------------------------------|-------------|-------------|-------------|-------------|
| 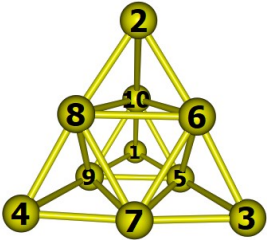 <p><math>\text{Au}_{10}^{2+}</math><br/>(<math>T_d</math>)<br/>singlet</p>                       | Au          | -1.90919614 | 1.90919614  | 1.90919614  |
|                                                                                                                                                                                    | Au          | 1.90919614  | -1.90919614 | 1.90919614  |
|                                                                                                                                                                                    | Au          | 1.90919614  | 1.90919614  | -1.90919614 |
|                                                                                                                                                                                    | Au          | -1.90919614 | -1.90919614 | -1.90919614 |
|                                                                                                                                                                                    | Au          | -0.00000000 | 2.02642215  | 0.00000000  |
|                                                                                                                                                                                    | Au          | 2.02642215  | -0.00000000 | 0.00000000  |
|                                                                                                                                                                                    | Au          | -0.00000000 | 0.00000000  | -2.02642215 |
|                                                                                                                                                                                    | Au          | 0.00000000  | -2.02642215 | -0.00000000 |
|                                                                                                                                                                                    | Au          | -2.02642215 | 0.00000000  | 0.00000000  |
|                                                                                                                                                                                    | Au          | 0.00000000  | -0.00000000 | 2.02642215  |
|  <p><math>\text{Au}_9\text{Pt}^{2+}.\text{A}</math><br/>(<math>C_{2v}</math>)<br/>doublet</p>     | Pt          | 0.00000000  | -0.00000000 | -1.90497415 |
|                                                                                                                                                                                    | Au          | 0.00000000  | 2.63733420  | -1.95262215 |
|                                                                                                                                                                                    | Au          | 1.45503911  | 1.44306111  | -0.00612800 |
|                                                                                                                                                                                    | Au          | -1.45503911 | 1.44306111  | -0.00612800 |
|                                                                                                                                                                                    | Au          | 2.70442921  | -0.00000000 | 1.90662515  |
|                                                                                                                                                                                    | Au          | 1.45503911  | -1.44306111 | -0.00612800 |
|                                                                                                                                                                                    | Au          | 0.00000000  | -2.63733420 | -1.95262215 |
|                                                                                                                                                                                    | Au          | -1.45503911 | -1.44306111 | -0.00612800 |
|                                                                                                                                                                                    | Au          | -2.70442921 | 0.00000000  | 1.90662515  |
|                                                                                                                                                                                    | Au          | -0.00000000 | 0.00000000  | 1.99736915  |
|  <p><math>\text{Au}_8\text{Pt}_2^{2+}.\text{A}</math><br/>(<math>C_s</math>)<br/>triplet</p>    | Pt          | 1.14144281  | 0.81770330  | 1.25838410  |
|                                                                                                                                                                                    | Pt          | 1.14144281  | 0.81770330  | -1.25838410 |
|                                                                                                                                                                                    | Au          | 1.14144281  | -1.44589787 | 2.68187220  |
|                                                                                                                                                                                    | Au          | 1.14144281  | -1.44589787 | -2.68187220 |
|                                                                                                                                                                                    | Au          | -1.15710836 | 1.63808536  | 0.00000000  |
|                                                                                                                                                                                    | Au          | -1.18545936 | -0.86639583 | 1.42614911  |
|                                                                                                                                                                                    | Au          | 1.16466782  | -1.76958090 | 0.00000000  |
|                                                                                                                                                                                    | Au          | -3.31907953 | -0.02144677 | 0.00000000  |
|                                                                                                                                                                                    | Au          | 1.14556481  | 3.16282448  | 0.00000000  |
|                                                                                                                                                                                    | Au          | -1.18545936 | -0.86639583 | -1.42614911 |
|  <p><math>\text{Au}_7\text{Pt}_3^{2+}.\text{A}</math><br/>(<math>C_{3v}</math>)<br/>quartet</p> | Pt          | 1.29498210  | -0.74765806 | 1.14725809  |
|                                                                                                                                                                                    | Pt          | -0.00000009 | 1.49531657  | 1.14725809  |
|                                                                                                                                                                                    | Pt          | -1.29498201 | -0.74765822 | 1.14725809  |
|                                                                                                                                                                                    | Au          | 0.00000000  | 3.10231624  | -0.99291807 |
|                                                                                                                                                                                    | Au          | -1.44459311 | 0.83403606  | -1.25428709 |
|                                                                                                                                                                                    | Au          | -2.68668459 | -1.55115797 | -0.99291807 |
|                                                                                                                                                                                    | Au          | 1.44459289  | 0.83403645  | -1.25428709 |
|                                                                                                                                                                                    | Au          | 2.68668459  | -1.55115797 | -0.99291807 |
|                                                                                                                                                                                    | Au          | 0.00000000  | 0.00000010  | 3.34340826  |
|                                                                                                                                                                                    | Au          | 0.00000022  | -1.66807222 | -1.25428709 |



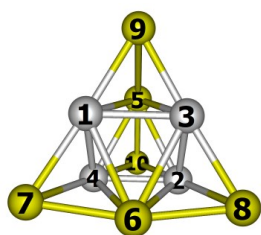

$\text{Au}_6\text{Pt}_4^{2+}.\text{A}$   
( $D_{2d}$ )  
quintet

|    |             |             |             |
|----|-------------|-------------|-------------|
| Pt | 1.29483810  | 1.29483810  | 0.00000000  |
| Pt | -1.29483810 | -1.29483810 | 0.00000000  |
| Pt | -1.29483810 | 1.29483810  | 0.00000000  |
| Pt | 1.29483810  | -1.29483810 | 0.00000000  |
| Au | 0.00000000  | 0.00000000  | 2.26016317  |
| Au | 0.00000000  | 0.00000000  | -2.26016317 |
| Au | 2.66886321  | 0.00000000  | -1.87859514 |
| Au | -2.66886321 | 0.00000000  | -1.87859514 |
| Au | 0.00000000  | 2.66886321  | 1.87859514  |
| Au | 0.00000000  | -2.66886321 | 1.87859514  |

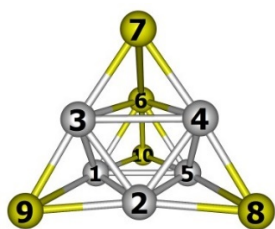

$\text{Au}_5\text{Pt}_5^{2+}.\text{A}$   
( $C_{2v}$ )  
sextet

|    |             |             |             |
|----|-------------|-------------|-------------|
| Pt | -1.52136112 | 1.29029010  | -0.01516100 |
| Pt | 0.00000000  | 0.00000000  | -1.65814813 |
| Pt | -1.52136112 | -1.29029010 | -0.01516100 |
| Pt | 1.52136112  | -1.29029010 | -0.01516100 |
| Pt | 1.52136112  | 1.29029010  | -0.01516100 |
| Au | 0.00000000  | 0.00000000  | 2.09950616  |
| Au | -0.00000000 | -2.66868620 | 1.69694013  |
| Au | 2.83403722  | -0.00000000 | -1.89817514 |
| Au | -2.83403722 | 0.00000000  | -1.89817514 |
| Au | 0.00000000  | 2.66868620  | 1.69694013  |

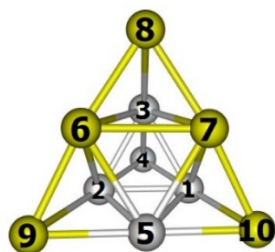

$\text{Au}_5\text{Pt}_5^{2+}.\text{B}$   
( $C_s$ )  
sextet

|    |             |             |             |
|----|-------------|-------------|-------------|
| Pt | 0.01264400  | 1.39250311  | 1.29322510  |
| Pt | 0.01264400  | 1.39250311  | -1.29322510 |
| Pt | -1.88017814 | 0.09212801  | 0.00000000  |
| Pt | -1.79734514 | 2.65057320  | -0.00000000 |
| Pt | 1.86005114  | 0.10289601  | -0.00000000 |
| Au | 0.01264400  | -1.52859812 | -1.44141611 |
| Au | 0.01264400  | -1.52859812 | 1.44141611  |
| Au | -2.00763016 | -2.60502820 | 0.00000000  |
| Au | 1.87591914  | 0.05144700  | -2.67775920 |
| Au | 1.87591914  | 0.05144700  | 2.67775920  |

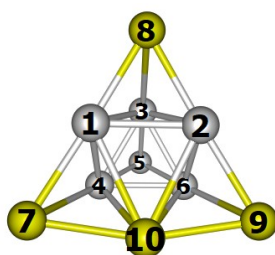

$\text{Au}_4\text{Pt}_6^{2+}.\text{A}$   
( $C_s$ )  
septet

|    |             |             |             |
|----|-------------|-------------|-------------|
| Pt | 1.08191108  | -0.79568106 | 1.29798410  |
| Pt | 1.08191108  | -0.79568106 | -1.29798410 |
| Pt | 1.14878909  | 1.62064913  | 0.00000000  |
| Pt | -1.06880508 | 0.85748406  | 1.31265310  |
| Pt | -0.93999007 | 3.02964323  | 0.00000000  |
| Pt | -1.06880508 | 0.85748406  | -1.31265310 |
| Au | -1.06880508 | -1.47201911 | 2.67873320  |
| Au | 3.26846125  | -0.05480600 | 0.00000000  |
| Au | -1.06880508 | -1.47201911 | -2.67873320 |
| Au | -1.36288810 | -1.71462513 | -0.00000000 |



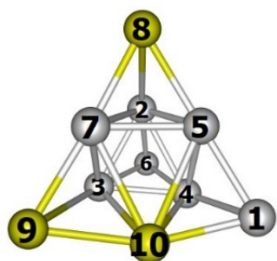

$\text{Au}_3\text{Pt}_7^{2+}.\text{A}$   
( $C_1$ )  
septet

|    |             |             |             |
|----|-------------|-------------|-------------|
| Pt | 1.64118924  | -1.49645925 | -2.20534308 |
| Pt | -1.81442278 | -0.56948653 | 0.68856613  |
| Pt | 0.45863957  | 0.30807548  | 1.83011522  |
| Pt | 0.82764889  | -1.71002417 | 0.17787910  |
| Pt | -0.60946049 | -0.42474314 | -1.65762304 |
| Pt | -0.49050561 | -2.01063842 | 2.31353526  |
| Pt | -0.65384360 | 1.72928908  | -0.20001093 |
| Au | -2.92398788 | 0.90690707  | -1.25724001 |
| Au | 1.52805878  | 2.63519622  | 1.00440916  |
| Au | 2.02857306  | 0.57904839  | -0.68229897 |

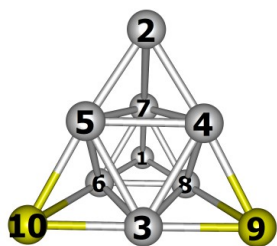

$\text{Au}_2\text{Pt}_8^{2+}.\text{A}$   
( $C_{2v}$ )  
nonet

|    |             |             |             |
|----|-------------|-------------|-------------|
| Pt | 0.00000000  | 2.55494218  | 1.82919213  |
| Pt | -0.00000000 | -2.55494218 | 1.82919213  |
| Pt | -0.00000000 | -0.00000000 | -1.89513314 |
| Pt | 1.34354210  | -1.39648710 | 0.03267100  |
| Pt | -1.34354210 | -1.39648710 | 0.03267100  |
| Pt | -1.34354210 | 1.39648710  | 0.03267100  |
| Pt | 0.00000000  | 0.00000000  | 1.91763214  |
| Pt | 1.34354210  | 1.39648710  | 0.03267100  |
| Au | 2.62910219  | -0.00000000 | -1.88166114 |
| Au | -2.62910219 | 0.00000000  | -1.88166114 |

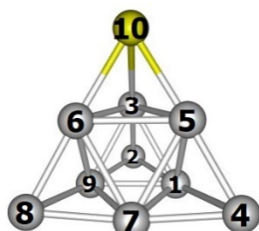

$\text{AuPt}_9^{2+}.\text{A}$   
( $C_{3v}$ )  
dectet

|    |             |             |             |
|----|-------------|-------------|-------------|
| Pt | 1.30834417  | 0.75537292  | -1.18750708 |
| Pt | -0.00000010 | 2.96050021  | -1.01376208 |
| Pt | -0.00000005 | 1.56040611  | 1.09768408  |
| Pt | 2.56386844  | -1.48025002 | -1.01376208 |
| Pt | 1.35135136  | -0.78020301 | 1.09768408  |
| Pt | -1.35135130 | -0.78020310 | 1.09768408  |
| Pt | 0.00000005  | -1.51074575 | -1.18750708 |
| Pt | -2.56386834 | -1.48025020 | -1.01376208 |
| Pt | -1.30834422 | 0.75537283  | -1.18750708 |
| Au | 0.00000000  | 0.00000000  | 3.26884623  |

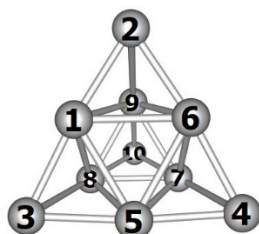

$\text{Pt}_{10}^{2+}.\text{A}$   
( $C_1$ )  
11-et

|    |             |             |             |
|----|-------------|-------------|-------------|
| Pt | 0.00000000  | 0.00000000  | -1.72233712 |
| Pt | 0.00000000  | 2.53834418  | -1.89170114 |
| Pt | -0.00000000 | -2.53834418 | -1.89170114 |
| Pt | -2.59671018 | 0.00000000  | 1.71971012  |
| Pt | -1.30402909 | -1.48296211 | 0.06612600  |
| Pt | -1.30402909 | 1.48296211  | 0.06612600  |
| Pt | 0.00000000  | 0.00000000  | 1.80181613  |
| Pt | 1.30402909  | -1.48296211 | 0.06612600  |
| Pt | 1.30402909  | 1.48296211  | 0.06612600  |
| Pt | 2.59671018  | -0.00000000 | 1.71971012  |
